# Supplementary material for: Enhancing the photocatalytic hydrogen production activity of BiVO4 [110] facets using oxygen vacancies
Source: Royal Society of Chemistry journal article supplement (doi:10.1039/d1ra07121a), 2021-12-22
Supplement: d1ra07121a1.pdf [file d1ra07121a1.pdf]

## Supplementary Information

### Enhancing Photocatalytic Hydrogen Production Activity in BiVO<sub>4</sub>

#### [110] Facet by Oxygen Vacancies

Jing Pan, xiaoxue Ma, Wannian Zhang, Jingguo Hu

#### The site of the O<sub>vac</sub> in BiVO<sub>4</sub> [110] facet

To investigate the site of the O<sub>vac</sub>, we firstly investigate the photocatalytic active site, as shown in the Fig. S1(a), the H<sub>2</sub>O molecule is adsorbed on surface different Bi atoms, the adsorption energies, defined as  $E_{\text{ads}} = E_{\text{tot}} - E_{\text{surf}} - E_{\text{H}_2\text{O}}$  (in which  $E_{\text{tot}}$ ,  $E_{\text{surf}}$ ,  $E_{\text{H}_2\text{O}}$  are total energies of BiVO<sub>4</sub> [110] facets adsorbed with and without H<sub>2</sub>O, and the energy of H<sub>2</sub>O molecular), are -0.60, -0.36, -0.46 and -0.67 eV, the lower adsorption energy indicates more stronger binding, thus Bi4 is considered as the optimum adsorption site. Additionally, there are two O<sub>vac</sub> could be created neighbouring Bi4, labeled by O<sub>vac1</sub> and O<sub>vac2</sub> in Fig. S2(b), the calculated formation energy  $E_{\text{form}}$  ( $E_{\text{form}} = E_{\text{Ovac}} - E_{\text{surf}} + 1/2 E_{\text{O}_2}$ , where  $E_{\text{Ovac}}$ ,  $E_{\text{surf}}$  and  $E_{\text{O}_2}$  are the total energies of BiVO<sub>4</sub> [110] facets with and without the O<sub>vac</sub> and molecular O<sub>2</sub>, respectively) is 3.86 eV for BiOV<sub>4</sub> with O<sub>vac1</sub>, higher than that of BiVO<sub>4</sub> with O<sub>vac2</sub> of 3.47 eV, indicating BiOV<sub>4</sub> with O<sub>vac1</sub> was more stable than BiOV<sub>4</sub> with O<sub>vac2</sub>.

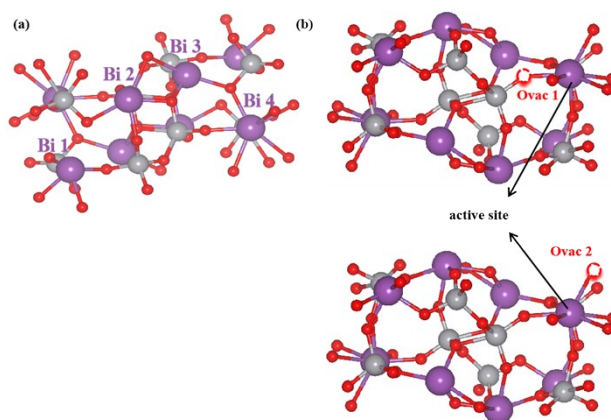

Fig. S1. Atomic structure of BiVO<sub>4</sub> [110] facets labeling (a) surface different Bi atoms for H<sub>2</sub>O molecule adsorption and (b) two different O<sub>vac</sub> with the O<sub>vac1</sub> and the O<sub>vac2</sub>.

## The effect of the $O_{vac}$ site on $BiVO_4$ [110] facet

We further create the  $O_{vac}$  coordinated with  $V_{5C}$  as shown in Fig. S2 (b). Compared to the  $O_{vac}$  near  $Bi_{7C}$ , the band gap decreases to 2.13 eV, there exist located states mainly consisted by Bi 6p, V 3d in the band gap. And the optical adsorption also changes accordingly, indicating the site of the  $O_{vac}$  has great influence on band gap, absorption spectra and density of states.

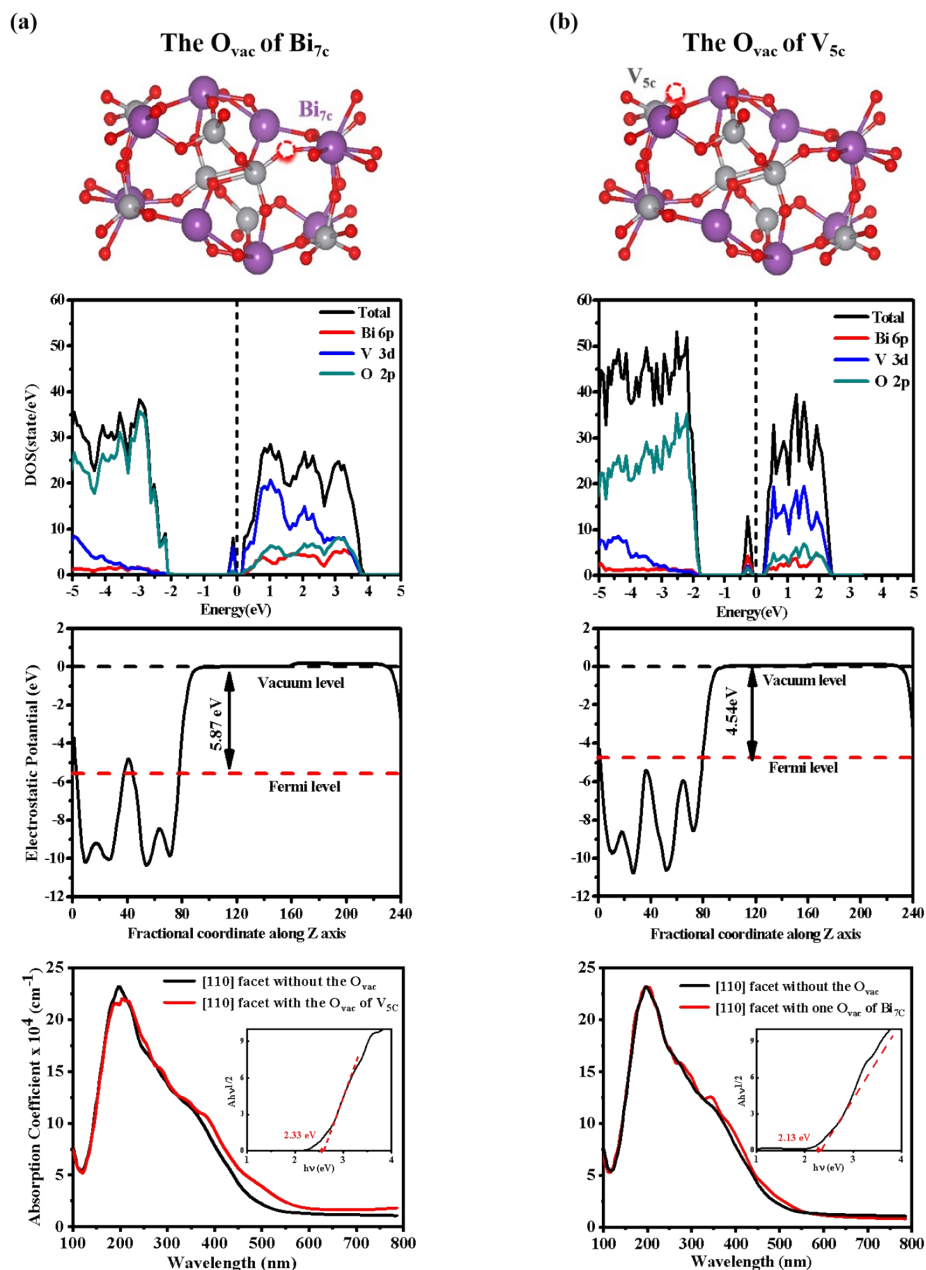

Fig. S2. The atomic structure, density of states, work function and absorption spectra of  $BiVO_4$  [110] facets with (a)  $Bi_{7C}$  and (b)  $V_{5C}$ .

### **The effect of the $O_{vac}$ concentration on $BiVO_4$ [110] facet**

To investigate the effect of the  $O_{vac}$  concentration on [110] facet, we create one, two and three  $O_{vac}$  forming the concentration of 3.13%, 6.25 % and 9.38 % as shown in Fig. S3, the work function and optical adsorption change greatly. For [110] facet with two  $O_{vac}$ , the band gap increases to 2.32 eV, there exist higher located states mainly consisted by V 3d, O 2p in the band gap. And the optical adsorption improves slightly over 400 nm. While for [110] facet with three  $O_{vac}$ , the band gap decreases to 2.03 eV, there exist more located states mainly consisted by Bi 6p, V 3d, O 2p in the band gap. And the optical adsorption improves more slightly over 400 nm. Thus, the  $O_{vac}$  concentration has great influence on  $BiVO_4$  [110] facet.

Additionally, due to the introduction of the  $O_{vac}$ , the band edges upshift and satisfy the requirement of the photocatalytic water-splitting. Thirdly, the work function decreases with the increasing of the  $O_{vac}$  concentration, indicating the charges more easily transfer from the bulk to the surface. Lastly, there appear more dangling bonds and the atom activity will be enhanced with the increasing of the  $O_{vac}$  concentration. Thus, we predicate that the the photocatalytic properties of [110] facet will be improved with the increasing of the  $O_{vac}$  concentration.

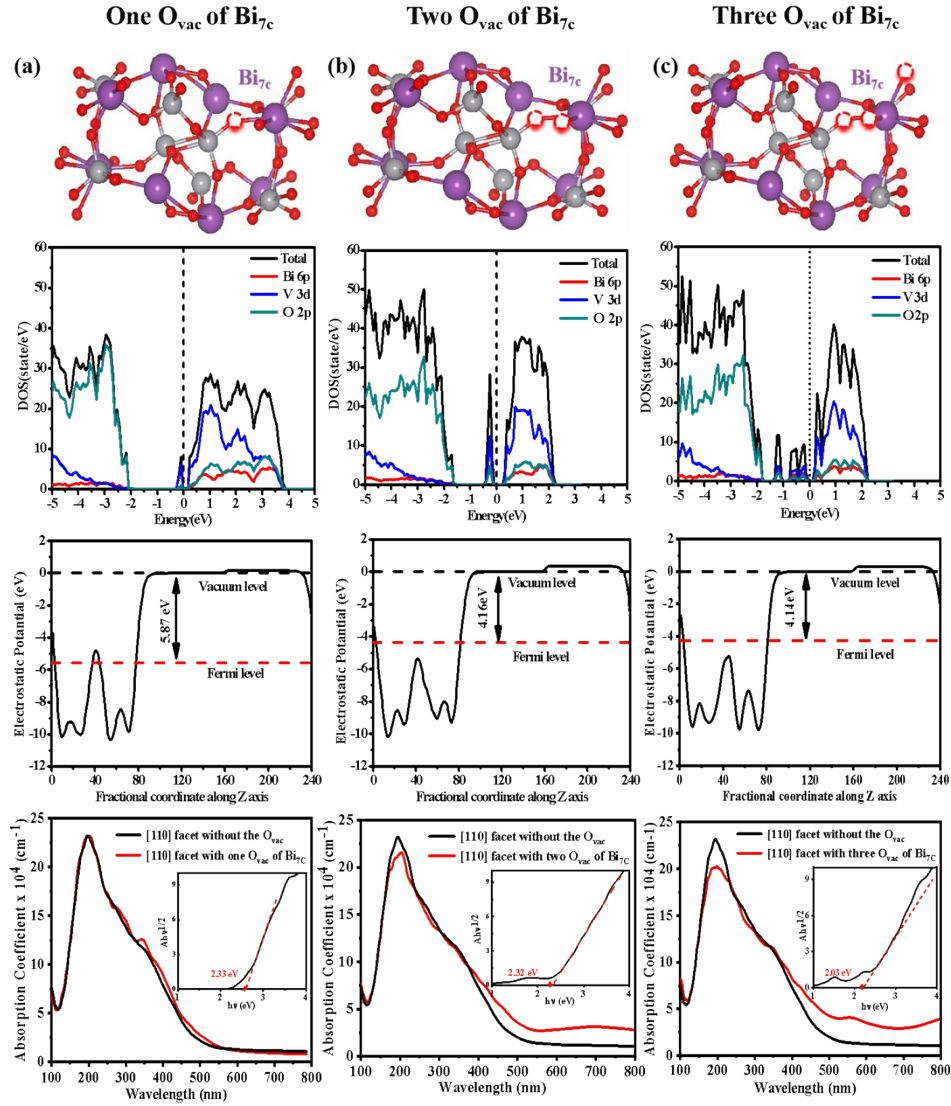

Fig. S3. The atomic structure, density of states, work function and absorption spectra of BiVO<sub>4</sub> [110] facets with the concentrations of (a) 3.13%, 6.25 % and (c) 9.38 % of O<sub>vac</sub>, the inset is optical band gap.
